# Supplementary material
Source: PubMed Central journal article supplement (PMC3703942)
Supplement: NIHMS477089-supplement-01.pdf [file NIHMS477089-supplement-01.pdf]

**Supplementary Table I. Imputation accuracy rates (in percent) of all imputed SNPs using HapMap II (HMII) and 1000 Genomes (1KG) data across the MAF spectrum. Red boldfaced are highest accuracy rates for each masked data.**

| Masking Rate | Public Data | Strategy | MAF spectrum |             |             | Polymorphic SNPs |              |                | Overall Accuracy |
|--------------|-------------|----------|--------------|-------------|-------------|------------------|--------------|----------------|------------------|
|              |             |          | Rare         | Low Freq    | Common      | CEU-specific     | YRI-specific | In both panels |                  |
| 5%           | HMII        | YRI      | 14.4         | 57.9        | 79.3        |                  | 71.7         | 78.3           | 77.1             |
|              |             | CEU      | 15.1         | 35.0        | 53.9        | 21.7             |              | 53.1           | 46.2             |
|              |             | INT      | 29.9         | <b>67.8</b> | 81.9        |                  |              | 80.7           | <b>80.7</b>      |
|              |             | UNI      | 35.4         | 63.2        | <b>82.6</b> | 44.1             | 73.5         | <b>82.4</b>    | 74.2             |
|              |             | MER      | 15.2         | 45.9        | 78.4        | 21.7             | 71.7         | 78.3           | 66.7             |
|              | 1KG         | YRI      | 17.2         | 61.1        | 78.3        |                  | 73.7         | 78.1           | 77.1             |
|              |             | CEU      | 15.4         | 34.0        | 54.7        | 23.5             |              | 54.9           | 47.8             |
|              |             | INT      |              | 67.2        | 80.8        |                  |              | 80.2           | 80.2             |
|              |             | UNI      | <b>37.5</b>  | 60.5        | 80.5        | <b>46.7</b>      | <b>74.1</b>  | 82.0           | 74.0             |
|              |             | MER      | 15.5         | 43.2        | 77.0        | 21.7             | 71.7         | 78.3           | 66.7             |
| 50%          | HMII        | YRI      | 12.6         | 49.6        | 71.0        |                  | 65.6         | 70.4           | 69.6             |
|              |             | CEU      | 14.4         | 28.7        | 46.6        | 27.3             |              | 45.9           | 44.3             |
|              |             | INT      | 27.8         | <b>58.4</b> | 73.8        |                  |              | 72.9           | 72.9             |
|              |             | UNI      | <b>30.7</b>  | 55.5        | <b>75.0</b> | <b>48.8</b>      | <b>67.8</b>  | 75.1           | 72.4             |
|              |             | MER      | 14.5         | 39.0        | 70.4        | 27.3             | 65.6         | 70.4           | 66.4             |
|              | 1KG         | YRI      | 7.2          | 52.2        | 71.1        |                  | 65.1         | 71.6           | 70.4             |
|              |             | CEU      | 13.4         | 28.5        | 49.2        | 29.4             |              | 49.2           | 46.8             |
|              |             | INT      |              | 57.0        | 74.2        |                  |              | 73.7           | <b>73.7</b>      |
|              |             | UNI      | 30.4         | 52.5        | 74.1        | 48.0             | 66.2         | <b>75.9</b>    | 71.4             |
|              |             | MER      | 13.3         | 36.1        | 70.2        | 29.4             | 65.1         | 71.6           | 66.2             |
| 80%          | HMII        | YRI      | 4.9          | 29.8        | 49.6        |                  | 43.8         | 49.3           | 48.4             |
|              |             | CEU      | 7.8          | 19.4        | 31.7        | 20.0             |              | 31.2           | 30.3             |
|              |             | INT      | 7.2          | 35.8        | 52.0        |                  |              | 51.2           | 51.2             |
|              |             | UNI      | <b>17.1</b>  | 36.3        | <b>53.9</b> | <b>35.3</b>      | <b>45.8</b>  | <b>54.1</b>    | <b>51.8</b>      |
|              |             | MER      | 7.9          | 24.7        | 49.2        | 20.0             | 43.8         | 49.3           | 46.4             |
|              | 1KG         | YRI      |              | 32.1        | 49.6        |                  | 42.9         | 50.4           | 49.0             |
|              |             | CEU      | 8.0          | 19.6        | 34.7        | 20.8             |              | 34.7           | 33.1             |
|              |             | INT      |              | <b>38.0</b> | 52.2        |                  |              | 51.8           | <b>51.8</b>      |
|              |             | UNI      | 16.1         | 32.7        | 52.1        | 30.8             | 44.6         | 53.8           | 50.1             |
|              |             | MER      | 7.8          | 23.1        | 48.9        | 20.8             | 42.9         | 50.4           | 46.3             |

Rare variants with  $MAF \leq 0.01$ ; Low frequency variants with  $0.01 < MAF \leq 0.05$ ; Common variants with  $MAF > 0.05$

INT refers the intersection strategy; UNI refers the union strategy; MER refers the merge strategy

CEU-specific SNPs are polymorphic only in CEU; YRI-specific SNPs are polymorphic only in YRI; SNPs in both panels are polymorphic in both CEU and YRI

**Supplementary Table II. Numbers of imputed SNPs and filtered SNPs (with MACH R<sub>sq</sub> over 0.3) in the masking data sets that were used for computing imputation accuracy.**

| Masking Rate | Public Data | Strategy | Imputed SNPs |          |        | Filtered SNPs |          |        |
|--------------|-------------|----------|--------------|----------|--------|---------------|----------|--------|
|              |             |          | Rare         | Low Freq | Common | Rare          | Low Freq | Common |
| 5%           | HMII        | YRI      | 13           | 61       | 903    | 9             | 54       | 880    |
|              |             | CEU      | 159          | 94       | 774    | 71            | 76       | 724    |
|              |             | INT      | 6            | 43       | 752    | 4             | 41       | 740    |
|              |             | UNI      | 163          | 111      | 898    | 111           | 105      | 889    |
|              |             | MER      | 166          | 112      | 925    | 78            | 92       | 900    |
|              | 1KG         | YRI      | 5            | 63       | 1129   | 3             | 58       | 1,068  |
|              |             | CEU      | 149          | 115      | 929    | 58            | 82       | 858    |
|              |             | INT      |              | 31       | 890    |               | 28       | 863    |
|              |             | UNI      | 153          | 147      | 1168   | 85            | 127      | 1,125  |
|              |             | MER      | 153          | 147      | 1168   | 60            | 115      | 1,102  |
| 50%          | HMII        | YRI      | 13           | 578      | 9063   | 5             | 483      | 8,503  |
|              |             | CEU      | 159          | 851      | 7842   | 60            | 637      | 6,967  |
|              |             | INT      | 6            | 412      | 7655   | 2             | 377      | 7,331  |
|              |             | UNI      | 163          | 1,007    | 8979   | 83            | 882      | 8,711  |
|              |             | MER      | 166          | 1,017    | 9250   | 64            | 779      | 8,667  |
|              | 1KG         | YRI      | 5            | 411      | 10032  |               | 317      | 9,036  |
|              |             | CEU      | 149          | 903      | 8615   | 50            | 611      | 7,568  |
|              |             | INT      |              | 213      | 8265   |               | 179      | 7,787  |
|              |             | UNI      | 153          | 1,101    | 10385  | 61            | 850      | 9,648  |
|              |             | MER      | 153          | 1,101    | 10382  | 51            | 761      | 9,331  |
| 80%          | HMII        | YRI      | 13           | 904      | 14,554 |               | 441      | 10,516 |
|              |             | CEU      | 159          | 1,301    | 12,607 | 32            | 684      | 8,629  |
|              |             | INT      | 6            | 613      | 12,303 |               | 347      | 9,416  |
|              |             | UNI      | 163          | 1,571    | 14,418 | 36            | 897      | 11,482 |
|              |             | MER      | 166          | 1,592    | 14,858 | 34            | 778      | 10,715 |
|              | 1KG         | YRI      |              | 613      | 16,040 |               | 222      | 9,464  |
|              |             | CEU      | 149          | 1,363    | 13,839 | 20            | 555      | 8,661  |
|              |             | INT      |              | 311      | 13,269 |               | 156      | 9,178  |
|              |             | UNI      | 153          | 1,665    | 16,613 | 18            | 597      | 10,663 |
|              |             | MER      | 153          | 1,665    | 16,612 | 22            | 628      | 9,792  |

Rare variants with  $MAF \leq 0.01$ ; Low frequency variants with  $0.01 < MAF \leq 0.05$ ; Common variants with  $MAF > 0.05$

INT refers the intersection strategy; UNI refers the union strategy; MER refers the merge strategy
